# Supplementary material for: Secreted gelsolin inhibits DNGR-1-dependent cross-presentation and cancer immunity
Source: PubMed Central journal article supplement (PMC8320529; doi:10.1016/j.cell.2021.05.021), 2021-07-22

**Cell, Volume 184**

**Supplemental information**

**Secreted gelsolin inhibits DNGR-1-dependent  
cross-presentation and cancer immunity**

**Evangelos Giampazolias, Oliver Schulz, Kok Haw Jonathan Lim, Neil C. Rogers, Probir Chakravarty, Naren Srinivasan, Oliver Gordon, Ana Cardoso, Michael D. Buck, Enzo Z. Poirier, Johnathan Canton, Santiago Zelenay, Stefano Sammiceli, Natalia Moncaut, Sunita Varsani-Brown, Ian Rosewell, and Caetano Reis e Sousa**

**Table S1. Distribution of clinical parameters (age, sex and tumour stage) between *sGSN*<sup>Low</sup> and *sGSN*<sup>High</sup> groups in human tumours, related to Figure 6**

| TCGA dataset           |                  |        |       |       |       |       |       |       |       |  |
|------------------------|------------------|--------|-------|-------|-------|-------|-------|-------|-------|--|
| <b>LIHC</b>            |                  |        |       |       |       |       |       |       |       |  |
| <b>AGE (years old)</b> | Group            | 10_19  | 20_29 | 30_39 | 40_49 | 50_59 | 60_69 | 70_79 | 80_89 |  |
| Chi-Square test        | <i>sGSN</i> High | 1      | 4     | 7     | 9     | 17    | 21    | 12    | 2     |  |
| p value = 0.79 ns      | <i>sGSN</i> Low  | 0      | 3     | 3     | 10    | 18    | 27    | 12    | 1     |  |
| <b>SEX</b>             | Group            | Female | Male  |       |       |       |       |       |       |  |
| Chi-Square test        | <i>sGSN</i> High | 28     | 46    |       |       |       |       |       |       |  |
| p value = 0.38 ns      | <i>sGSN</i> Low  | 22     | 52    |       |       |       |       |       |       |  |
| <b>STAGE</b>           | Group            | 0      | 1     | 2     | 3     | 4     |       |       |       |  |
| Chi-Square test        | <i>sGSN</i> High | 6      | 28    | 19    | 20    | 1     |       |       |       |  |
| p value = 0.30 ns      | <i>sGSN</i> Low  | 1      | 34    | 22    | 16    | 1     |       |       |       |  |
| <b>HNSC</b>            |                  |        |       |       |       |       |       |       |       |  |
| <b>AGE (years old)</b> | Group            | 10_19  | 20_29 | 30_39 | 40_49 | 50_59 | 60_69 | 70_79 | 80_89 |  |
| Chi-Square test        | <i>sGSN</i> High | 1      | 0     | 2     | 14    | 30    | 39    | 9     | 9     |  |
| p value = 0.75 ns      | <i>sGSN</i> Low  | 0      | 0     | 1     | 13    | 33    | 39    | 13    | 5     |  |
| <b>SEX</b>             | Group            | Female | Male  |       |       |       |       |       |       |  |
| Chi-Square test        | <i>sGSN</i> High | 33     | 71    |       |       |       |       |       |       |  |
| p value = 0.15 ns      | <i>sGSN</i> Low  | 23     | 81    |       |       |       |       |       |       |  |
| <b>STAGE</b>           | Group            | 0      | 1     | 2     | 3     | 4     |       |       |       |  |
| Chi-Square test        | <i>sGSN</i> High | 1      | 4     | 17    | 20    | 62    |       |       |       |  |
| p value = 0.27 ns      | <i>sGSN</i> Low  | 6      | 2     | 12    | 20    | 64    |       |       |       |  |
| <b>STAD</b>            |                  |        |       |       |       |       |       |       |       |  |
| <b>AGE (years old)</b> | Group            | 30_39  | 40_49 | 50_59 | 60_69 | 70_79 | 80_89 |       |       |  |
| Chi-Square test        | <i>sGSN</i> High | 1      | 4     | 12    | 12    | 8     | 4     |       |       |  |
| p value = 0.49 ns      | <i>sGSN</i> Low  | 0      | 5     | 8     | 10    | 15    | 3     |       |       |  |
| <b>SEX</b>             | Group            | Female | Male  |       |       |       |       |       |       |  |
| Chi-Square test        | <i>sGSN</i> High | 15     | 26    |       |       |       |       |       |       |  |
| p value = 0.82 ns      | <i>sGSN</i> Low  | 17     | 24    |       |       |       |       |       |       |  |
| <b>STAGE</b>           | Group            | 0      | 1     | 2     | 3     | 4     |       |       |       |  |
| Chi-Square test        | <i>sGSN</i> High | 1      | 4     | 15    | 15    | 6     |       |       |       |  |
| p value = 0.22 ns      | <i>sGSN</i> Low  | 1      | 7     | 9     | 22    | 2     |       |       |       |  |

**Table S2. List of human genes encoding F-actin binding proteins, related to Figure 7**

| <b>F-actin binding proteins</b> | <b>Human gene symbol</b> | <b>Full human gene name</b>                            |
|---------------------------------|--------------------------|--------------------------------------------------------|
| 1                               | <i>ACTR2</i>             | Actin-related protein 2                                |
| 2                               | <i>ACTR3</i>             | Actin-related protein 3                                |
| 3                               | <i>ACTN1</i>             | Alpha-Actinin                                          |
| 4                               | <i>ANLN</i>              | Anillin                                                |
| 5                               | <i>CAPZA1</i>            | Capping actin protein of muscle Z-line subunit alpha 1 |
| 6                               | <i>CAPZA2</i>            | Capping actin protein of muscle Z-line subunit alpha 2 |
| 7                               | <i>CAPZB</i>             | Capping actin protein of muscle Z-line subunit beta    |
| 8                               | <i>CARMIL1</i>           | Capping protein regulator and myosin 1 linker 1        |
| 9                               | <i>CDC42</i>             | Cell division control protein 42 homolog               |
| 10                              | <i>CFL1</i>              | Cofilin 1                                              |
| 11                              | <i>CFL2</i>              | Cofilin 2                                              |
| 12                              | <i>EZR</i>               | Ezrin                                                  |
| 13                              | <i>FSCN1</i>             | Fascin                                                 |
| 14                              | <i>FLNA</i>              | Filamin A                                              |
| 15                              | <i>FLNB</i>              | Filamin B                                              |
| 16                              | <i>FMN1</i>              | Formin-1                                               |
| 17                              | <i>FMN2</i>              | Formin-2                                               |
| 18                              | <i>GSN</i>               | Gelsolin                                               |
| 19                              | <i>CCDC88A</i>           | Girdin                                                 |
| 20                              | <i>CAPG</i>              | Macrophage-capping protein                             |
| 21                              | <i>MSN</i>               | Moesin                                                 |
| 22                              | <i>MYH1</i>              | Myosin heavy chain 1                                   |
| 23                              | <i>MYH10</i>             | Myosin heavy chain 10                                  |
| 24                              | <i>MYH11</i>             | Myosin heavy chain 11                                  |
| 25                              | <i>MYH13</i>             | Myosin heavy chain 13                                  |
| 26                              | <i>MYH14</i>             | Myosin heavy chain 14                                  |
| 27                              | <i>MYH15</i>             | Myosin heavy chain 15                                  |
| 28                              | <i>MYH16</i>             | Myosin heavy chain 16                                  |
| 29                              | <i>MYH2</i>              | Myosin heavy chain 2                                   |
| 30                              | <i>MYH3</i>              | Myosin heavy chain 3                                   |
| 31                              | <i>MYH4</i>              | Myosin heavy chain 4                                   |
| 32                              | <i>MYH6</i>              | Myosin heavy chain 6                                   |
| 33                              | <i>MYH7</i>              | Myosin heavy chain 7                                   |
| 34                              | <i>MYH8</i>              | Myosin heavy chain 8                                   |
| 35                              | <i>MYH9</i>              | Myosin heavy chain 9                                   |
| 36                              | <i>MYO3A</i>             | Myosin IIIA                                            |
| 37                              | <i>MYO3B</i>             | Myosin IIIB                                            |
| 38                              | <i>MYO9A</i>             | Myosin IXA                                             |
| 39                              | <i>MYO9B</i>             | Myosin IXB                                             |
| 40                              | <i>MYL5</i>              | Myosin light chain 5                                   |
| 41                              | <i>MYL1</i>              | Myosin light chain 1                                   |
| 42                              | <i>MYL2</i>              | Myosin light chain 2                                   |
| 43                              | <i>MYL3</i>              | Myosin light chain 3                                   |
| 44                              | <i>MYL4</i>              | Myosin light chain 4                                   |
| 45                              | <i>MYL6</i>              | Myosin light chain 6                                   |
| 46                              | <i>MYL6B</i>             | Myosin light chain 6B                                  |
| 47                              | <i>MYL7</i>              | Myosin light chain 7                                   |
| 48                              | <i>MYL9</i>              | Myosin light chain 9                                   |
| 49                              | <i>MYLK2</i>             | Myosin light chain kinase 2, skeletal/cardiac muscle   |
| 50                              | <i>MYLK</i>              | Myosin light chain kinase, smooth muscle               |
| 51                              | <i>MYLIP</i>             | Myosin regulatory light chain interacting protein      |
| 52                              | <i>MYO5A</i>             | Myosin VA                                              |
| 53                              | <i>MYO5B</i>             | Myosin VB                                              |
| 54                              | <i>MYO5C</i>             | Myosin VC                                              |
| 55                              | <i>MYO6</i>              | Myosin VI                                              |
| 56                              | <i>MYO7A</i>             | Myosin VIIA                                            |
| 57                              | <i>MYO7B</i>             | Myosin VIIB                                            |
| 58                              | <i>MYO10</i>             | Myosin X                                               |
| 59                              | <i>MYO15A</i>            | Myosin XVA                                             |
| 60                              | <i>MYO18A</i>            | Myosin XVIII A                                         |
| 61                              | <i>MYO18B</i>            | Myosin XVIII B                                         |
| 62                              | <i>MYO1A</i>             | Myosin-IA                                              |
| 63                              | <i>MYO1B</i>             | Myosin-IB                                              |
| 64                              | <i>MYO1C</i>             | Myosin-IC                                              |
| 65                              | <i>MYO1D</i>             | Myosin-ID                                              |
| 66                              | <i>MYO1E</i>             | Myosin-IE                                              |
| 67                              | <i>MYO1F</i>             | Myosin-IF                                              |
| 68                              | <i>MYO1G</i>             | Myosin-IG                                              |
| 69                              | <i>MYO1H</i>             | Myosin-IH                                              |
| 70                              | <i>MYLL1</i>             | Myosin, light chain, cardiac muscle-Like 1             |
| 71                              | <i>DIAPH1</i>            | Protein diaphanous homolog 1                           |
| 72                              | <i>RDX</i>               | Radixin                                                |
| 73                              | <i>SCIN</i>              | Scinderin                                              |
| 74                              | <i>SPTA1</i>             | Spectrin alpha, erythrocytic 1                         |
| 75                              | <i>SPTAN1</i>            | Spectrin alpha, nonerythrocytic 1                      |
| 76                              | <i>SPTB</i>              | Spectrin beta, erythrocytic                            |
| 77                              | <i>SPTBN1</i>            | Spectrin beta, nonerythrocytic 1                       |
| 78                              | <i>SPTBN2</i>            | Spectrin beta, nonerythrocytic 2                       |
| 79                              | <i>SPTBN4</i>            | Spectrin beta, nonerythrocytic 4                       |
| 80                              | <i>SPIRE1</i>            | Spire type actin nucleation factor 1                   |
| 81                              | <i>SPIRE2</i>            | Spire type actin nucleation factor 2                   |
| 82                              | <i>TMOD1</i>             | Tropomodulin-1                                         |
| 83                              | <i>TMOD2</i>             | Tropomodulin-2                                         |
| 84                              | <i>TMOD3</i>             | Tropomodulin-3                                         |
| 85                              | <i>TPM1</i>              | Tropomyosin alpha-1 chain                              |
| 86                              | <i>TPM3</i>              | Tropomyosin alpha-3 Chain                              |
| 87                              | <i>TPM4</i>              | Tropomyosin alpha-4 chain                              |
| 88                              | <i>TPM2</i>              | Tropomyosin beta chain                                 |
| 89                              | <i>VASP</i>              | Vasodilator-stimulated phosphoprotein                  |
| 90                              | <i>VIL1</i>              | Villin1                                                |

**Table S3. List of human genes encoding microtubule binding proteins, related to Figure 7**

| <b>Microtubule binding proteins</b> | <b>Human gene symbol</b> | <b>Full human gene name</b>                                 |
|-------------------------------------|--------------------------|-------------------------------------------------------------|
| 1                                   | <i>ASPM</i>              | Abnormal spindle-like microcephaly-associated protein       |
| 2                                   | <i>CEP55</i>             | Centrosomal protein of 55 kDa                               |
| 3                                   | <i>CKAP5</i>             | Cytoskeleton-associated protein                             |
| 4                                   | <i>CLIP1</i>             | CAP-Gly domain containing linker protein 1                  |
| 5                                   | <i>CLIP2</i>             | CAP-Gly domain containing linker protein 2                  |
| 6                                   | <i>DCTN1</i>             | Dynactin subunit 1                                          |
| 7                                   | <i>DCTN2</i>             | Dynactin subunit 2                                          |
| 8                                   | <i>DLGAP5</i>            | Disks large-associated protein 5                            |
| 9                                   | <i>DNAH1</i>             | Dynein axonemal heavy chain 1                               |
| 10                                  | <i>DNAH10</i>            | Dynein axonemal heavy chain 10                              |
| 11                                  | <i>DNAH11</i>            | Dynein axonemal heavy chain 11                              |
| 12                                  | <i>DNAH12</i>            | Dynein axonemal heavy chain 12                              |
| 13                                  | <i>DNAH14</i>            | Dynein axonemal heavy chain 14                              |
| 14                                  | <i>DNAH17</i>            | Dynein axonemal heavy chain 17                              |
| 15                                  | <i>DNAH2</i>             | Dynein axonemal heavy chain 2                               |
| 16                                  | <i>DNAH3</i>             | Dynein axonemal heavy chain 3                               |
| 17                                  | <i>DNAH5</i>             | Dynein axonemal heavy chain 5                               |
| 18                                  | <i>DNAH6</i>             | Dynein axonemal heavy chain 6                               |
| 19                                  | <i>DNAH7</i>             | Dynein axonemal heavy chain 7                               |
| 20                                  | <i>DNAH8</i>             | Dynein axonemal heavy chain 8                               |
| 21                                  | <i>DNAH9</i>             | Dynein axonemal heavy chain 9                               |
| 22                                  | <i>DNAI1</i>             | Dyneins intermediate chain 1                                |
| 23                                  | <i>DNAI2</i>             | Dyneins intermediate chain 2                                |
| 24                                  | <i>DNAL1</i>             | Dynein light intermediate chains 2                          |
| 25                                  | <i>DNAL4</i>             | Dynein light intermediate chains 4                          |
| 26                                  | <i>DNALI1</i>            | Dynein light intermediate chains 1                          |
| 27                                  | <i>DYNC1H1</i>           | Dynein cytoplasmic 1 heavy chain 1                          |
| 28                                  | <i>DYNC1LI1</i>          | Dynein cytoplasmic 1 light intermediate chain 1             |
| 29                                  | <i>DYNC1LI2</i>          | Dynein cytoplasmic 1 light intermediate chain 2             |
| 30                                  | <i>DYNC2LI1</i>          | Dynein cytoplasmic 2 light intermediate chain 1             |
| 31                                  | <i>DYNLL1</i>            | Dynein light chain 1, cytoplasmic                           |
| 32                                  | <i>DYNLL2</i>            | Dynein light chain 2, cytoplasmic                           |
| 33                                  | <i>DYNLRB1</i>           | Dynein light chain roadblock-type 1                         |
| 34                                  | <i>DYNLRB2</i>           | Dynein light chain roadblock-type 2                         |
| 35                                  | <i>DYNLT1</i>            | Dynein light chain Tctex-type 1                             |
| 36                                  | <i>DYNLT3</i>            | Dynein light chain Tctex-type 3                             |
| 37                                  | <i>KATNA1</i>            | Katanin p60 ATPase-containing subunit A1                    |
| 38                                  | <i>KATNB1</i>            | Katanin p60 ATPase-containing subunit B1                    |
| 39                                  | <i>KIF11</i>             | Kinesin family member 11                                    |
| 40                                  | <i>KIF12</i>             | Kinesin family member 12                                    |
| 41                                  | <i>KIF13A</i>            | Kinesin family member 13A                                   |
| 42                                  | <i>KIF13B</i>            | Kinesin family member 13B                                   |
| 43                                  | <i>KIF14</i>             | Kinesin family member 14                                    |
| 44                                  | <i>KIF15</i>             | Kinesin family member 15                                    |
| 45                                  | <i>KIF16B</i>            | Kinesin family member 16B                                   |
| 46                                  | <i>KIF17</i>             | Kinesin family member 17                                    |
| 47                                  | <i>KIF18A</i>            | Kinesin family member 18A                                   |
| 48                                  | <i>KIF19</i>             | Kinesin family member 19                                    |
| 49                                  | <i>KIF1A</i>             | Kinesin family member 1A                                    |
| 50                                  | <i>KIF1B</i>             | Kinesin family member 1B                                    |
| 51                                  | <i>KIF1C</i>             | Kinesin family member 1C                                    |
| 52                                  | <i>KIF20A</i>            | Kinesin family member 20A                                   |
| 53                                  | <i>KIF20B</i>            | Kinesin family member 20B                                   |
| 54                                  | <i>KIF21A</i>            | Kinesin family member 21A                                   |
| 55                                  | <i>KIF21B</i>            | Kinesin family member 21B                                   |
| 56                                  | <i>KIF22</i>             | Kinesin family member 22                                    |
| 57                                  | <i>KIF23</i>             | Kinesin family member 23                                    |
| 58                                  | <i>KIF24</i>             | Kinesin family member 24                                    |
| 59                                  | <i>KIF25</i>             | Kinesin family member 25                                    |
| 60                                  | <i>KIF26A</i>            | Kinesin family member 26A                                   |
| 61                                  | <i>KIF26B</i>            | Kinesin family member 26B                                   |
| 62                                  | <i>KIF27</i>             | Kinesin family member 27                                    |
| 63                                  | <i>KIF2A</i>             | Kinesin family member 2A                                    |
| 64                                  | <i>KIF2C</i>             | Kinesin family member 2C                                    |
| 65                                  | <i>KIF3A</i>             | Kinesin family member 3A                                    |
| 66                                  | <i>KIF3B</i>             | Kinesin family member 3B                                    |
| 67                                  | <i>KIF3C</i>             | Kinesin family member 3C                                    |
| 68                                  | <i>KIF4A</i>             | Kinesin family member 4A                                    |
| 69                                  | <i>KIF4B</i>             | Kinesin family member 4B                                    |
| 70                                  | <i>KIF5A</i>             | Kinesin family member 5A                                    |
| 71                                  | <i>KIF5B</i>             | Kinesin family member 5B                                    |
| 72                                  | <i>KIF5C</i>             | Kinesin family member 5C                                    |
| 73                                  | <i>KIF6</i>              | Kinesin family member 6                                     |
| 74                                  | <i>KIF7</i>              | Kinesin family member 7                                     |
| 75                                  | <i>KIF9</i>              | Kinesin family member 9                                     |
| 76                                  | <i>KIFAP3</i>            | Kinesin-2 associated protein                                |
| 77                                  | <i>KIFC1</i>             | Kinesin family member C1                                    |
| 78                                  | <i>KIFC2</i>             | Kinesin family member C2                                    |
| 79                                  | <i>KIFC3</i>             | Kinesin family member C3                                    |
| 80                                  | <i>KLC1</i>              | Kinesin light chain 1                                       |
| 81                                  | <i>KLC2</i>              | Kinesin light chain 2                                       |
| 82                                  | <i>KLC3</i>              | Kinesin light chain 3                                       |
| 83                                  | <i>KLC4</i>              | Kinesin light chain 4                                       |
| 84                                  | <i>MAP1A</i>             | Microtubule-associated protein 1A                           |
| 85                                  | <i>MAP1B</i>             | Microtubule-associated protein 1B                           |
| 86                                  | <i>MAP2</i>              | Microtubule-associated protein 2                            |
| 87                                  | <i>MAP4</i>              | Microtubule-associated protein 4                            |
| 88                                  | <i>MAP6</i>              | Microtubule-associated protein 6                            |
| 89                                  | <i>MAP7</i>              | Microtubule-associated protein 7                            |
| 90                                  | <i>MAP9</i>              | Microtubule-associated protein 9                            |
| 91                                  | <i>MAPRE1</i>            | Microtubule-associated protein RP/EB family member 1        |
| 92                                  | <i>MAPRE2</i>            | Microtubule-associated protein RP/EB family member 2        |
| 93                                  | <i>MAPRE3</i>            | Microtubule-associated protein RP/EB family member 3        |
| 94                                  | <i>MAPT</i>              | Microtubule associated protein tau                          |
| 95                                  | <i>PAFAH1B1</i>          | Platelet-activating factor acetylhydrolase IB subunit alpha |
| 96                                  | <i>PLEC</i>              | Plectin                                                     |
| 97                                  | <i>TUBG1</i>             | Tubulin gamma 1                                             |

**Table S4. List of primers for RT-qPCR, related to STAR Methods, Key Resources Table, Oligonucleotides**

| Mouse Primers          | Name                     | Sequence                 |
|------------------------|--------------------------|--------------------------|
| RT-qPCR                | <i>Ccl24</i> Fwd         | CCAAGAAGGGCCATAAGATCTG   |
|                        | <i>Ccl24</i> Rev         | GCCCCTTTAGAAGGCTGGTT     |
|                        |                          |                          |
|                        | <i>Ccl3</i> Fwd          | ACTGCCCTTGCTGTTCTTCT     |
|                        | <i>Ccl3</i> Rev          | CTGCCGGTTTCTCTTAGTCA     |
|                        |                          |                          |
|                        | <i>Retnla</i> Fwd        | GACTGCTACTGGGTGTGCTT     |
|                        | <i>Retnla</i> Rev        | GCTGGGTTCTCCACCTCTC      |
|                        |                          |                          |
|                        | <i>Chil4</i> Fwd         | AAGGCTGCTACTCACTCCAC     |
|                        | <i>Chil4</i> Rev         | TCCAGCACTAACAGTAGGGTCA   |
|                        |                          |                          |
|                        | <i>Arg1</i> Fwd          | GGAATCTGCATGGGCAACCTGTGT |
|                        | <i>Arg1</i> Rev          | AGGGTCTACGTCTCGCAAGCCA   |
|                        |                          |                          |
|                        | <i>IL-33</i> Fwd         | TGAGACTCCGTTCTGGCCTC     |
|                        | <i>IL-33</i> Rev         | CTTTCATGCTTGGTACCCGAT    |
|                        |                          |                          |
|                        | <i>Col1a2</i> Fwd        | GCAGGTTACCTACTCTGTCCT    |
|                        | <i>Col1a2</i> Rev        | CTTGCCCCATTCATTTGTCT     |
|                        |                          |                          |
|                        | <i>Col3a1</i> Fwd        | CTGGAGAACCTGGTGCAAAT     |
|                        | <i>Col3a1</i> Rev        | CCTCGGAAGCCACTAGGAC      |
|                        |                          |                          |
|                        | <i>Acta2</i> Fwd         | ACTGGGACGACATGGAAAAG     |
|                        | <i>Acta2</i> Rev         | G TTCAGTGGTGCCTCTGTCA    |
|                        |                          |                          |
|                        | <i>Areg2</i> Fwd         | GGTCTTAGGCTCAGGCCATTA    |
| <i>Areg2</i> Rev       | CGCTTATGGTGGAACCTCTC     |                          |
|                        |                          |                          |
| <i>Nippo_Actin</i> Fwd | ACGACGTGGCAGCTCTCGTTGTGG |                          |
| <i>Nippo_Actin</i> Rev | GGTGCTTCGGTCAGCAGCACGGG  |                          |
|                        |                          |                          |
| <i>18S RNA</i> Fwd     | CGCCGCTAGAGGTGAAATTCT    |                          |
| <i>18S RNA</i> Rev     | CGAACCTCCGACTTTCGTTCT    |                          |

# Data S1. Gating strategy items, related to STAR Methods, Method details, Analysis of tumour tissue, tdLNs and lymphoid organs

**Thymus-Lymphoid panel (Figures S1B, D)**

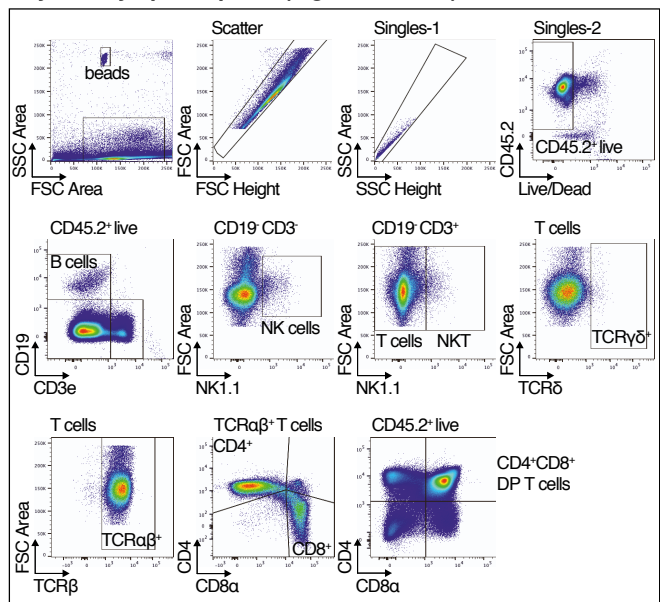

**Thymus-Myeloid panel (Figure S1G)**

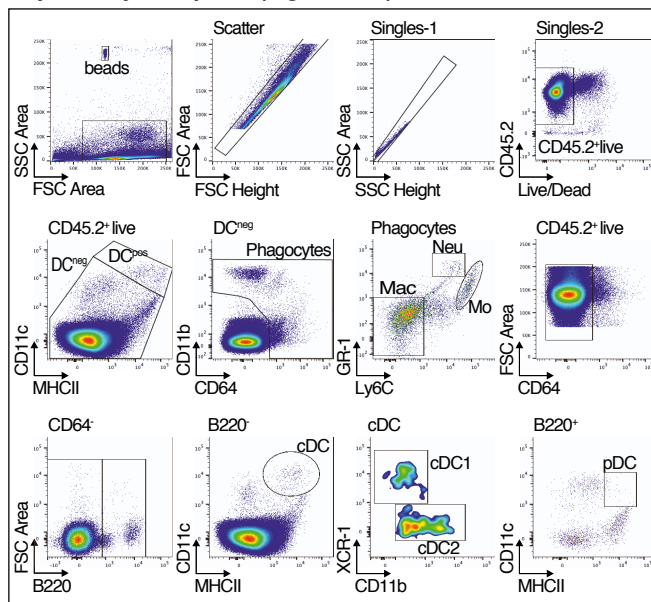

**Spleen-Lymphoid panel (Figures S1B, E)**

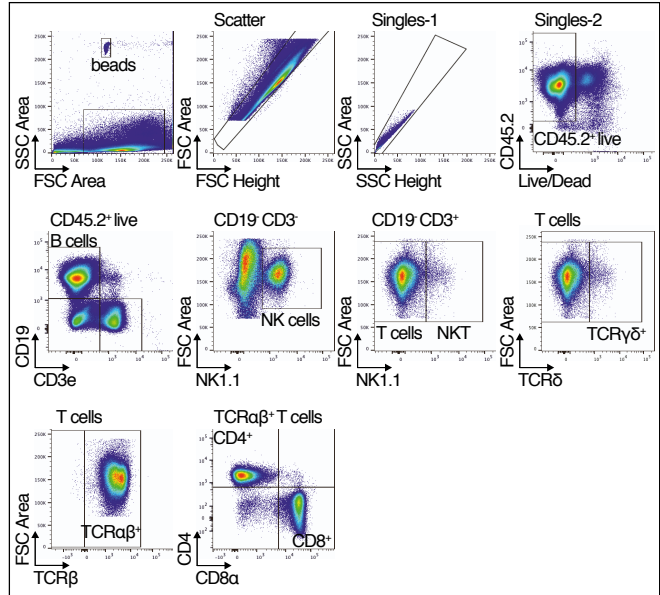

**Spleen-Myeloid panel (Figure S1H)**

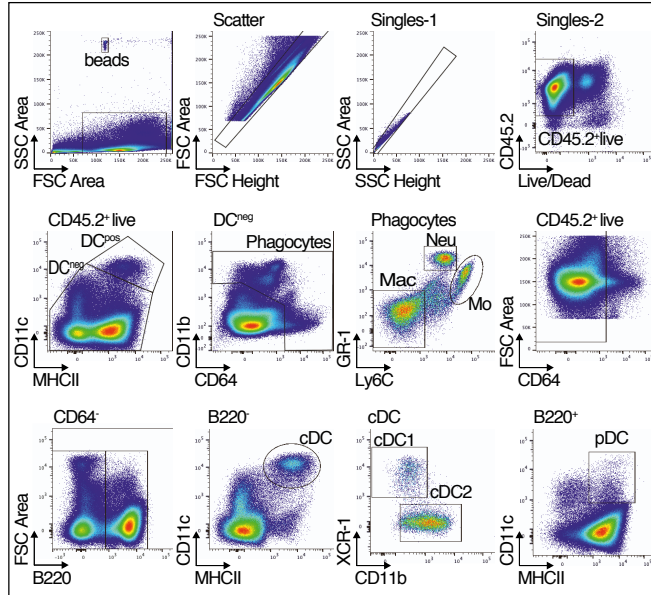

**iLN-Lymphoid panel (Figures S1B, F)**

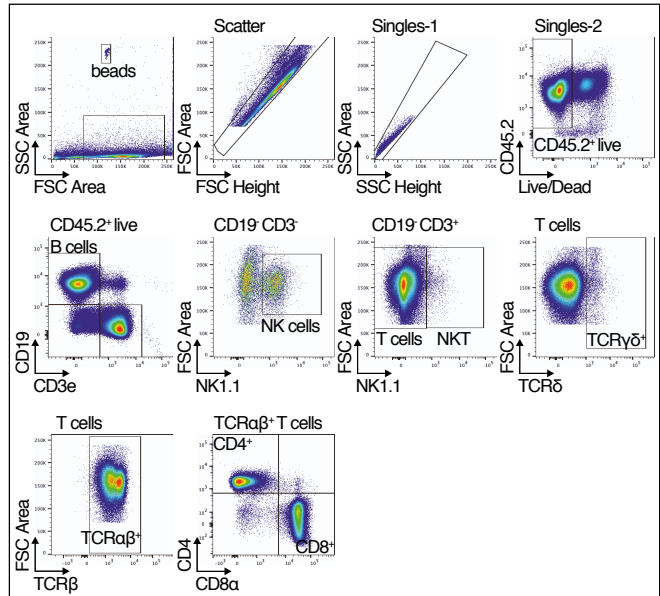

**iLN-Myeloid panel (Figure S1I)**

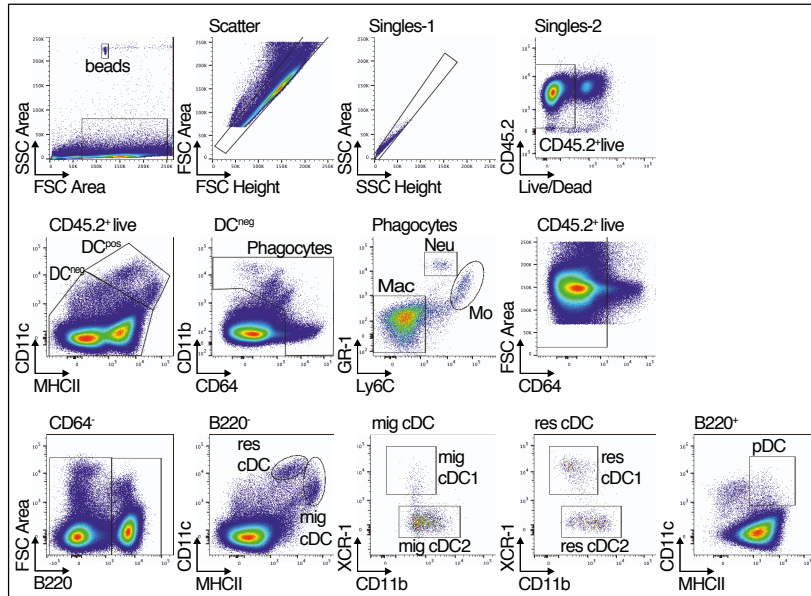



## Data S2. Gating strategy items, related to Figure 4

### B16 LA-OVA-mCherry tumours-Myeloid panel (Figures 4A, C)

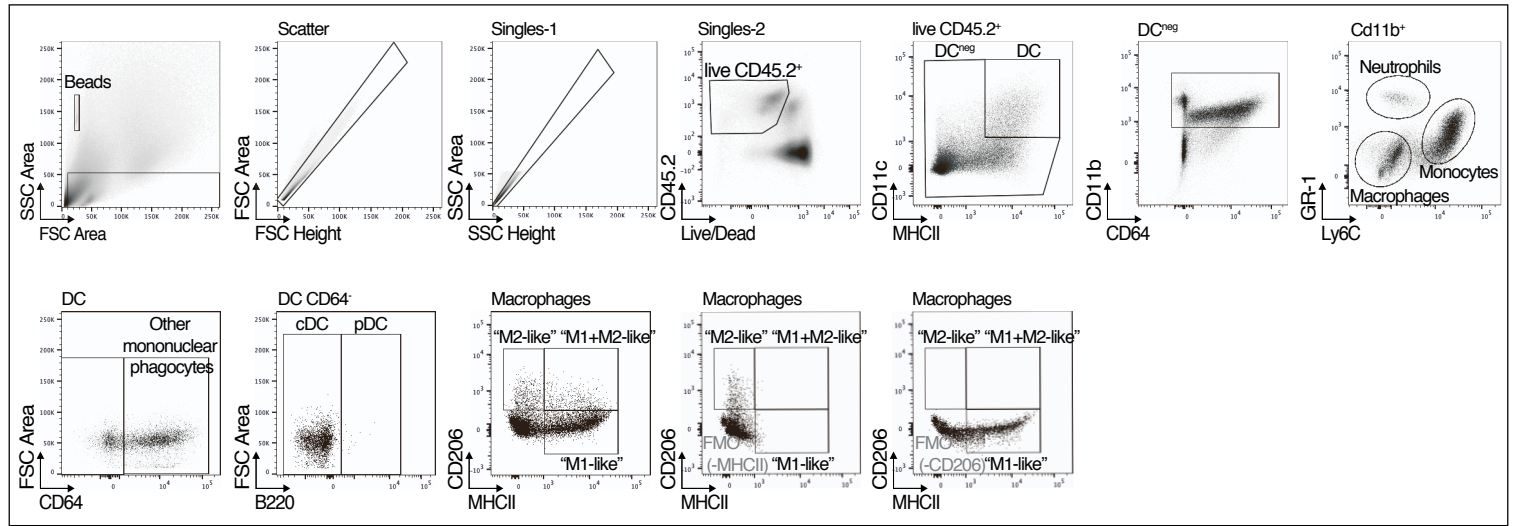

### B16 LA-OVA-mCherry tumours-Lymphoid panel (Figures 4B, E)

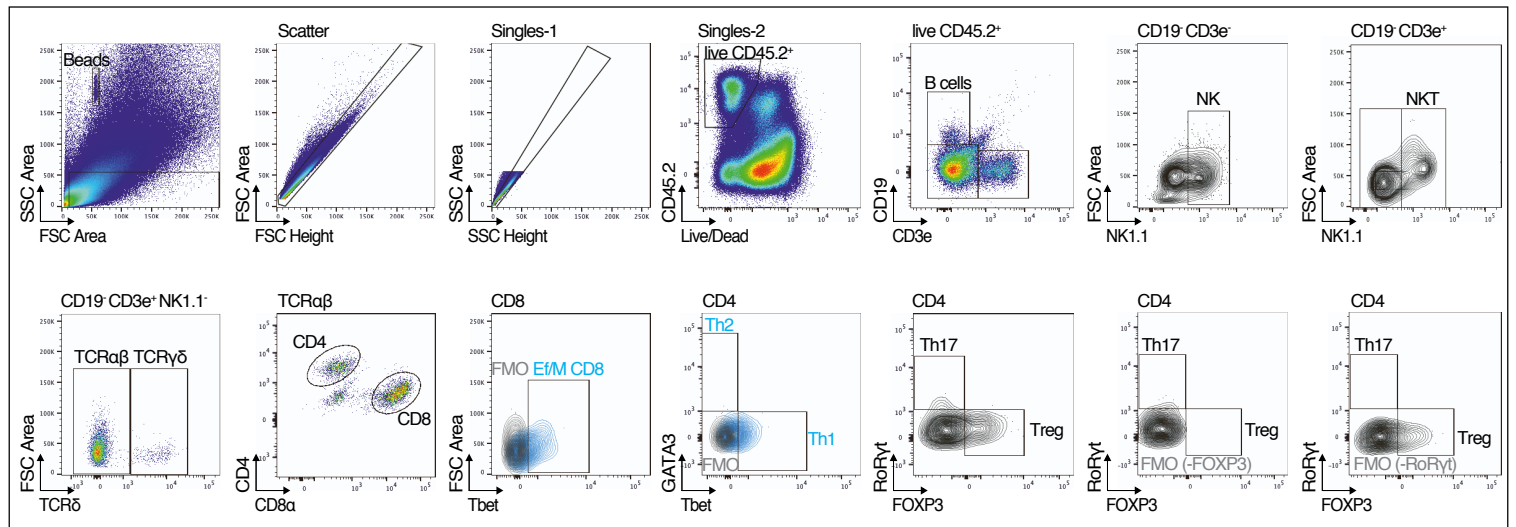

### B16 LA-OVA-mCherry tumours + tdLN-DC panel (Figures 4D and 5B)

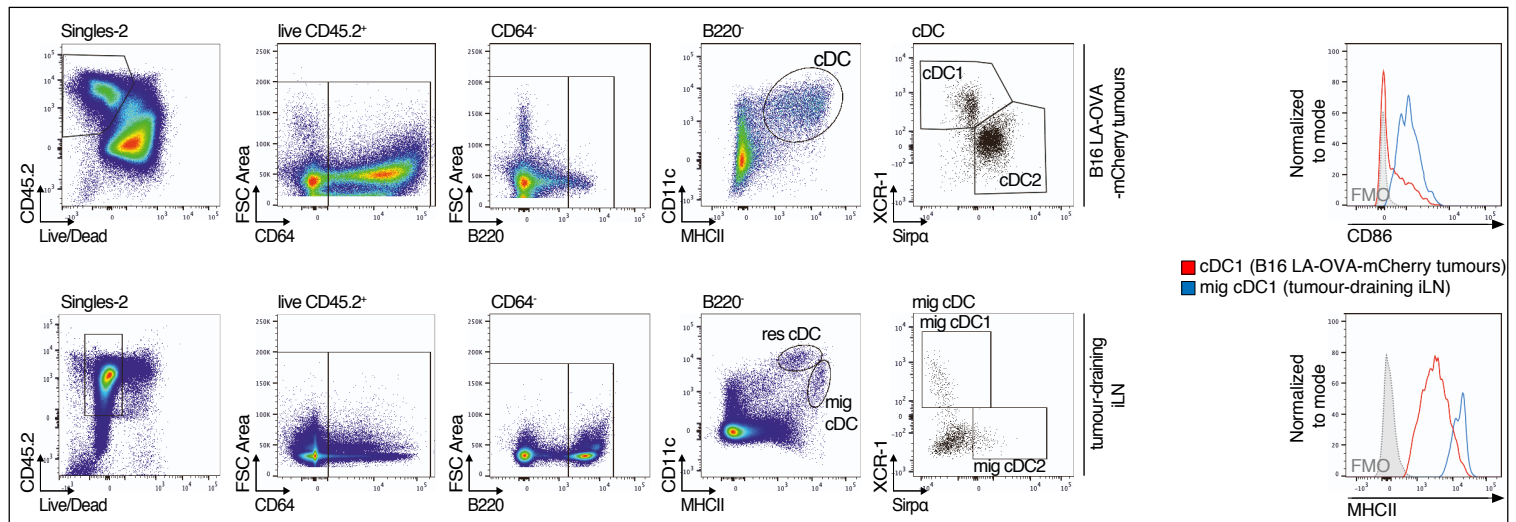

# Data S3. Gating strategy items, related to Figure 5 and Supplemental Figure 4

## B16 LA-OVA-mCherry tumours-DC panel (Figures 5A and S4C)

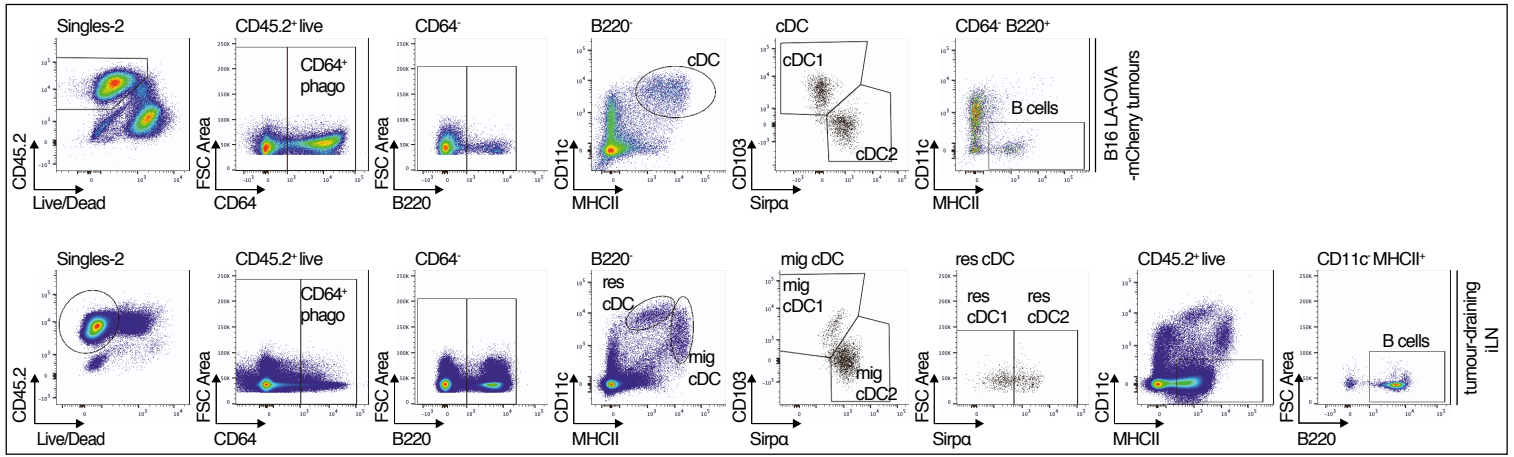

## MCA-205 LA-OVA-mCherry tumours-DC panel (Figures S4D, G and H)

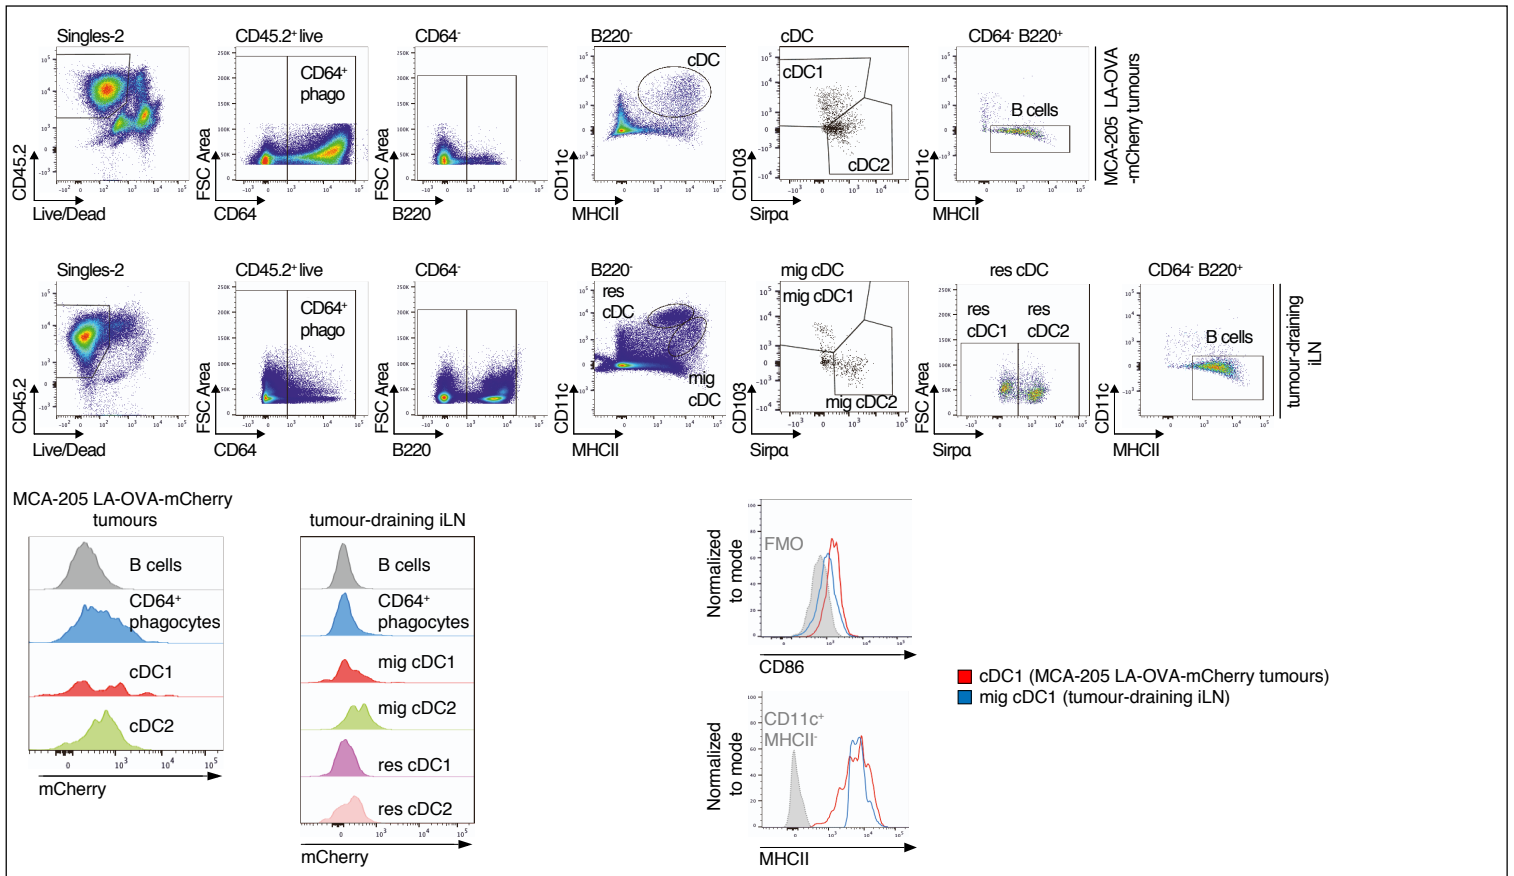

## tumour draining axillary and inguinal LN (of B16 LA-OVA-mCherry tumours)-DC panel-FACS sorting (Figures 5C and S4I, J)

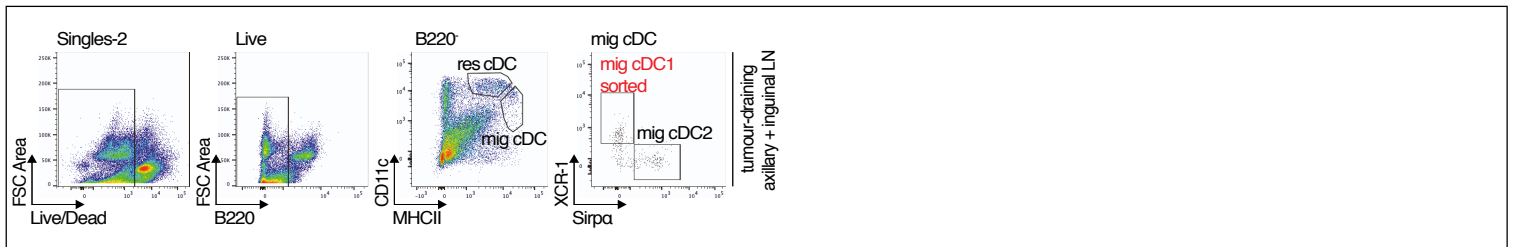

Supplement: mmc1.pdf [file mmc1.pdf]
